# Supplementary material for: ERK Phosphorylation Regulates the Aml1/Runx1 Splice Variants and the TRP Channels Expression during the Differentiation of Glioma Stem Cell Lines
Source: MDPI journal article supplement (doi:10.3390/cells10082052), 2021-08-10
Supplement: s1 [file s1]

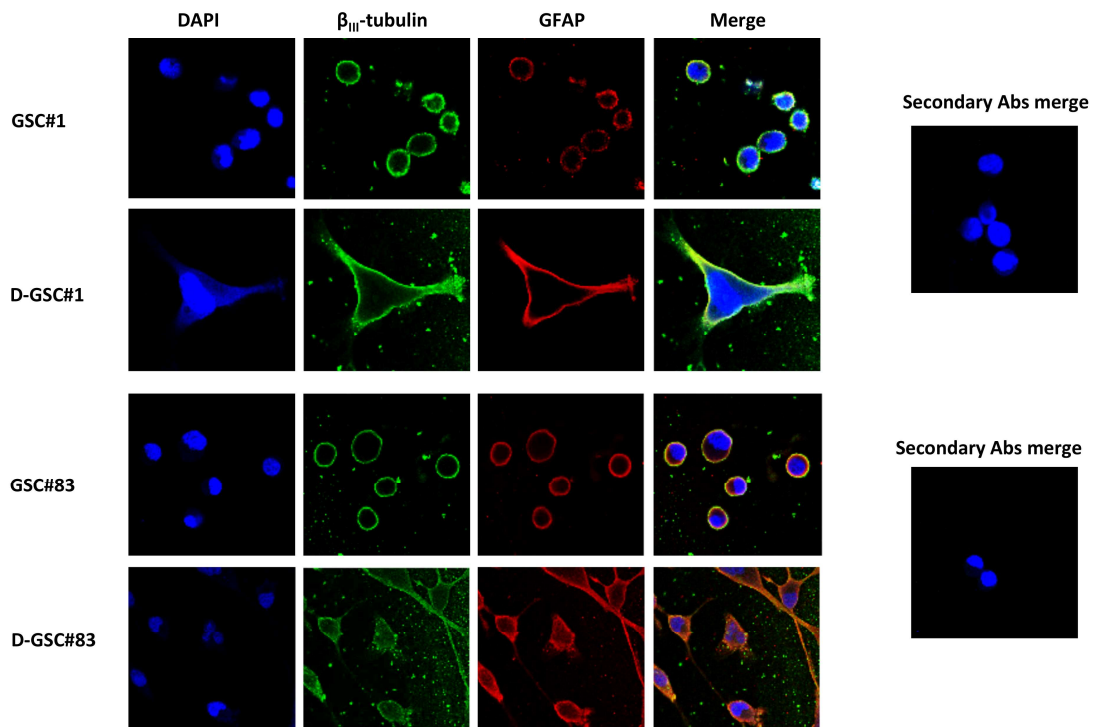

**Figure S1.** Changes in the expression of neural markers during differentiation of different GSC lines: GSCs and D-GSCs were fixed, permeabilized, and stained with anti-human betaIII-tubulin and GFAP Abs followed by Alexa Fluor-488 and Alexa Fluor-594 secondary Abs, respectively. 40,6-diamidino-2-phenylindole (DAPI) was used to counterstain nuclei. Magnification 60x.

**Table S1.** Aml1b and Aml1c splice variants mRNA fold expression in D-GSCs expressed as relative fold with respect to D-NSC.

| Phenotype | Cell lines | Aml1b mRNA<br>Fold<br>expression | Aml1c mRNA<br>Fold<br>expression |
|-----------|------------|----------------------------------|----------------------------------|
|           | D-NSC      | 1.00                             | 1.00                             |
| PN-like   | D-GSC#1    | 2.61                             | 2.71                             |
| MES-like  | D-GSC#83   | 5.04                             | 12.53                            |
| PN-like   | D-GSC#23C  | 1.77                             | 2.46                             |
| PN-like   | D-GSC#28   | 2.77                             | 1.15                             |
| MES-like  | D-GSC#30   | 7.79                             | 0.80                             |
| PN-like   | D-GSC#68   | 2.06                             | 0.76                             |
| PN-like   | D-GSC#70   | 1.06                             | 0.40                             |

mRNA samples extracted from D-NSCs and D-GSCs. Fold expression represents fold difference of individual gene expression in D-GSCs compared to the D-NSCs. The expression levels were normalized to the average Ct value of two housekeeping genes (GAPDH and RPLP0) and calculated by the  $\Delta\Delta C_t$  method.

**Table S2.** TRPA1 and TRPV1 channels mRNA fold expression in D-GSCs expressed as relative fold with respect to D-NSC.

| <b>Phenotype</b> | <b>Cell lines</b> | <b>TRPA1 mRNA</b>          | <b>TRPV1 mRNA</b>          |
|------------------|-------------------|----------------------------|----------------------------|
|                  |                   | <b>Fold<br/>expression</b> | <b>Fold<br/>expression</b> |
|                  | D-NSC             | 1.00                       | 1.00                       |
| PN-like          | D-GSC#1           | 4.31                       | 0.15                       |
| MES-like         | D-GSC#83          | 37.21                      | 0.31                       |
| PN-like          | D-GSC#23C         | 4.67                       | 0.13                       |
| PN-like          | D-GSC#28          | 0.11                       | 0.11                       |
| MES-like         | D-GSC#30          | 1.07                       | 0.00                       |
| PN-like          | D-GSC#68          | 0.27                       | 0.30                       |
| PN-like          | D-GSC#70          | 0.21                       | 0.19                       |

mRNA samples extracted from D-NSCs and D-GSCs. Fold expression represents fold difference of individual gene expression in D-GSCs compared to the D-NSCs. The expression levels were normalized to the average Ct value of two housekeeping genes (GAPDH and RPLP0) and calculated by the  $\Delta\Delta C_t$  method.
